# Supplementary material
Source: PubMed Central journal article supplement (PMC4136028)
Supplement: AAC.02536-13_zac008143103so1.pdf [file AAC.02536-13_zac008143103so1.pdf]

Table S1. Primers used in the study

| Target and primer name<br>Gene sequencing | Nucleotide sequence (5'— 3') |
|-------------------------------------------|------------------------------|
| <i>pmrB</i>                               |                              |
| PmrB1                                     | GCAACCAACTGGAGCAGAG          |
| PmrB2                                     | GAGCAACTCGATGGACTCGT         |
| SeqpmrB1                                  | GAAGTGCAGGCCGAGGTC           |
| SeqpmrB2                                  | TCCAGCAGGAGGTTGAGTTC         |
| <i>phoQ</i>                               |                              |
| PhoQ1                                     | GCTGGTCGAGGAGCAACC           |
| PhoQ2                                     | CTGGCGCGACAGGTAGAT           |
| SeqPhoQ1                                  | GTAGAGCTGCTCGCGGAAC          |
| SeqPhoQ2                                  | AACTACACGCCGCGCTAC           |
| <i>parS</i>                               |                              |
| SeqC1                                     | AAGAGCGGAAGTGCTTTCAA         |
| SeqC2                                     | CACGAAACATGGAACACCTG         |
| SeqparRC2                                 | (1)                          |
| SeqparSC1                                 | (1)                          |
| SeqparSC4                                 | (1)                          |
| SeqparSC5                                 | (1)                          |
| <i>cprS</i>                               |                              |
| CprS1                                     | CACCTGGAAGCTGTTTCGATG        |
| CprS4                                     | ATGCTGACCTTCATGCTGCT         |
| SeqCprS1                                  | CGACGATGAACCAGACCAG          |
| SeqCprS2                                  | CTGTCCGACGCCATCATC           |
| SeqCprS3                                  | GGAAAGCAACACCCTCAACG         |
| <i>colS</i>                               |                              |
| colS1                                     | GTCCATCAACTCCGTCAGGT         |
| colS2                                     | GAAAAGTCGAGGTCGACAGG         |
| SeqcolS1                                  | CTTCGACGAGACCCTTGG           |
| SeqcolS2                                  | ACAATTGCTCGCGCTTGA           |

Ref:

1. Guenard S, Muller C, Monlezun L, et al. Multiple Mutations Lead to MexXY-OprM-Dependent Aminoglycoside Resistance in Clinical Strains of *Pseudomonas aeruginosa*. *Antimicrobial Agents and Chemotherapy* 2014;58:221-8.
